# Supplementary material
Source: publisher figshare collection journal article supplement (https://gsajournals.figshare.com/ndownloader/files/15112073)
Supplement: Supplementary file 1 [file 15112073]

## Sheet: Spc42
ORF	name	Any cells?	GFP foci	RFP foci	Colocalised foci	GFP in normal location	GFP at 3rd location	Abnormal RFP
YIL035C	CKA1	0
YPL255W	BBP1	0
YLR372W	SUR4	0
YHR133C	NSG1	1	1	1	1	0	0	0
YML064C	TEM1	0
YLR018C	POM34	1	1	1	1	1	0	0
YDL072C	YET3	1	1	1	1	0	0	0
YPR114W	YPR114W	0
YCR034W	FEN1	0
YML075C	HMG1	0
YML031W	NDC1	1	1	1	1	0	0	0
YHL003C	LAG1	1	1	1	1	0	1	0
YER053C-A	YER053C-A	0
YBR233W-A	DAD3	0
YDL092W	SRP14	1	1	1	1	1	0	0
YPL233W	NSL1	1	1	1	1	1	0	0
YLR064W	PER33	1	1	1	1	0	0	0
YMR055C	BUB2	1	1	1	1	1	0	0
YKR037C	SPC34	1	1	1	1	1	1	0
YPL124W	SPC29	0
YHR085W	IPI1	1	0	1	0	1	0	0
YBR211C	AME1	0
YPL209C	IPL1	1	1	1	1	0	0	0
YGR086C	PIL1	1	1	1	1	1	0	1
YIL106W	MOB1	1	1	1	1	1	0	0
YBR236C	ABD1	1	0	1	0	1	0	0
YGL190C	CDC55	1	1	1	1	0	0	0
YDR388W	RVS167	1	1	1	1	1	0	0
YKL089W	MIF2	1	1	1	1	1	0	0
YFR028C	CDC14	1	1	1	1	1	0	0
YIL144W	TID3	1	1	1	1	1	0	0
YAL016W	TPD3	0
YPR137W	RRP9	1	0	1	0	1	0	1
YGR092W	DBF2	1	1	1	1	1	0	1
YJR053W	BFA1	1	1	1	1	1	0	0
YOR233W	KIN4	1	1	1	0	1	0	0
YGL216W	KIP3	1	1	1	1	1	0	0
YMR001C	CDC5	1	1	1	1	0	0	0
YBR156C	SLI15	0
YDR108W	TRS85	1	1	1	1	0	1	0
YGR098C	ESP1	1	0	1	0	1	0	0
YPL242C	IQG1	1	1	1	1	0	1	0
YAL024C	LTE1	1	1	1	1	0	0	0
YLL003W	SFI1	1	1	1	1	1	0	0
YMR219W	ESC1	1	0	1	0	1	0	0
YJR109C	CPA2	1	1	1	1	1	0	0
YAR019C	CDC15	1	1	1	1	1	0	0
YGL093W	SPC105	1	1	1	1	0	0	0

## Sheet: Spc110C
ORF	name	Any cells?	GFP foci	RFP foci	Colocalised foci	GFP in normal location	GFP at 3rd location	Abnormal RFP
YIL035C	CKA1	0
YPL255W	BBP1	0
YLR372W	SUR4	1	1	1	1	1	0	0
YHR133C	NSG1	1	1	1	1	1	1	0
YML064C	TEM1	1	1	1	1	0	1	1
YLR018C	POM34	0
YDL072C	YET3	1	1	1	1	1	0	0
YPR114W	YPR114W	1	1	1	1	1	0	0
YCR034W	FEN1	1	1	1	1	1	0	0
YML075C	HMG1	1	1	1	1	1	0	0
YML031W	NDC1	1	1	1	1	1	0	0
YHL003C	LAG1	1	1	1	1	1	0	0
YER053C-A	YER053C-A	1	1	1	1	1	1	0
YBR233W-A	DAD3	1	1	1	1	1	1	0
YDL092W	SRP14	1	1	1	1	0	0	0
YPL233W	NSL1	1	1	1	1	0	0	0
YLR064W	PER33	1	1	1	1	0	0	0
YMR055C	BUB2	1	1	1	1	1	0	0
YKR037C	SPC34	1	1	1	0	0	1	1
YPL124W	SPC29	0
YHR085W	IPI1	1	0	0	0	1	0	1
YBR211C	AME1	0
YPL209C	IPL1	0
YGR086C	PIL1	1	1	1	0	1	0	0
YIL106W	MOB1	0
YBR236C	ABD1	1	0	0	0	1	0	1
YGL190C	CDC55	0
YDR388W	RVS167	1	0	0	0	1	1	1
YKL089W	MIF2	1	1	1	1	1	0	1
YFR028C	CDC14	1	1	1	1	1	0	0
YIL144W	TID3	1	1	1	1	1	0	0
YAL016W	TPD3	1	0	0	0	1	0	1
YPR137W	RRP9	1	0	0	0	1	0	1
YGR092W	DBF2	1	1	1	1	0	1	1
YJR053W	BFA1	1	1	1	1	1	0	0
YOR233W	KIN4	1	1	1	1	0	0	0
YGL216W	KIP3	0
YMR001C	CDC5	1	0	0	0	1	0	1
YBR156C	SLI15	0
YDR108W	TRS85	1	1	1	0	1	1	1
YGR098C	ESP1	1	0	1	0	1	0	1
YPL242C	IQG1	1	0	1	0	1	0	1
YAL024C	LTE1	0
YLL003W	SFI1	0
YMR219W	ESC1	1	0	0	0	1	0	1
YJR109C	CPA2	1	0	0	0	1	0	1
YAR019C	CDC15	1	1	1	1	1	0	0
YGL093W	SPC105	1	1	1	1	1	0	1

## Sheet: Spc110N
ORF	name	Any cells?	GFP foci	RFP foci	Colocalised foci	GFP in normal location	GFP at 3rd location	Abnormal RFP
YIL035C	CKA1	1	1	1	1	0	0	0
YPL255W	BBP1	1	1	1	1	0	0	0
YLR372W	SUR4	1	1	1	1	1	0	0
YHR133C	NSG1	1	0	1	0	0	1	0
YML064C	TEM1	1	1	1	1	0	1	0
YLR018C	POM34	1	1	1	1	1	0	0
YDL072C	YET3	1	1	1	1	1	0	1
YPR114W	YPR114W	0
YCR034W	FEN1	0
YML075C	HMG1	1	1	1	1	0	0	0
YML031W	NDC1	1	1	0	0	1	0	1
YHL003C	LAG1	1	1	1	1	1	0	0
YER053C-A	YER053C-A	1	1	1	1	1	0	0
YBR233W-A	DAD3	1	1	1	1	0	1	1
YDL092W	SRP14	0
YPL233W	NSL1	1	1	1	1	1	1	0
YLR064W	PER33	1	1	1	1	1	0	0
YMR055C	BUB2	1	1	1	1	1	0	0
YKR037C	SPC34	1	1	1	1	1	0	0
YPL124W	SPC29	1	1	1	1	1	0	0
YHR085W	IPI1	1	1	1	1	1	0	0
YBR211C	AME1	1	1	1	1	1	1	0
YPL209C	IPL1	0
YGR086C	PIL1	1	1	1	1	0	1	0
YIL106W	MOB1	1	1	1	1	1	0	0
YBR236C	ABD1	1	1	1	1	1	0	0
YGL190C	CDC55	1	1	1	1	0	0	0
YDR388W	RVS167	1	1	1	1	1	0	0
YKL089W	MIF2	1	1	0	0	1	0	1
YFR028C	CDC14	1	1	1	1	1	0	0
YIL144W	TID3	0
YAL016W	TPD3	1	1	1	1	0	0	0
YPR137W	RRP9	1	0	0	0	1	0	1
YGR092W	DBF2	1	1	1	1	0	1	0
YJR053W	BFA1	1	1	1	1	1	0	0
YOR233W	KIN4	1	1	1	1	0	0	0
YGL216W	KIP3	1	0	1	0	0	1	0
YMR001C	CDC5	1	1	1	1	0	0	0
YBR156C	SLI15	1	1	1	1	0	0	0
YDR108W	TRS85	1	1	1	1	0	0	0
YGR098C	ESP1	1	1	1	1	1	0	0
YPL242C	IQG1	1	0	1	0	0	1	0
YAL024C	LTE1	0
YLL003W	SFI1	1	1	1	1	1	0	0
YMR219W	ESC1	1	1	1	1	1	0	0
YJR109C	CPA2	1	1	1	1	1	0	0
YAR019C	CDC15	1	1	1	1	1	0	0
YGL093W	SPC105	0

## Sheet: Nud1
ORF	name	Any cells?	GFP foci	RFP foci	Colocalised foci	GFP in normal location	GFP at 3rd location	Abnormal RFP
YIL035C	CKA1	1	1	1	1	1	0	0
YPL255W	BBP1	1	1	1	1	0	1	0
YLR372W	SUR4	1	1	1	1	1	0	0
YHR133C	NSG1	1	1	1	1	1	0	0
YML064C	TEM1	1	1	1	1	0	1	0
YLR018C	POM34	1	0	1	0	1	0	1
YDL072C	YET3	1	1	1	1	0	0	0
YPR114W	YPR114W	1	1	1	1	1	0	0
YCR034W	FEN1	0
YML075C	HMG1	1	1	1	1	1	0	0
YML031W	NDC1	1
YHL003C	LAG1	1	1	1	1	1	0	0
YER053C-A	YER053C-A	1	1	1	1	0	0	0
YBR233W-A	DAD3	1	1	1	1	1	0	0
YDL092W	SRP14	0
YPL233W	NSL1	0
YLR064W	PER33	1	1	1	1	0	0	0
YMR055C	BUB2	1	1	1	1	1	0	0
YKR037C	SPC34	1	0	1	1	0	0	0
YPL124W	SPC29	0
YHR085W	IPI1	1	1	1	1	1	0	0
YBR211C	AME1	1	1	1	1	1	1	0
YPL209C	IPL1	1	1	1	1	0	1	0
YGR086C	PIL1	1	0	1	0	1	0	0
YIL106W	MOB1	1	1	1	1	1	0	0
YBR236C	ABD1	1	1	1	1	1	0	0
YGL190C	CDC55	1	1	1	1	0	0	0
YDR388W	RVS167	1	1	1	1	1	0	0
YKL089W	MIF2	0
YFR028C	CDC14	1	1	1	1	1	0	0
YIL144W	TID3	1	0	1	0	0	0	0
YAL016W	TPD3	0
YPR137W	RRP9	1	0	1	0	1	0	0
YGR092W	DBF2	1	1	1	1	1	0	0
YJR053W	BFA1	1	1	1	1	1	0	0
YOR233W	KIN4	1	0	1	0	1	0	0
YGL216W	KIP3	1	1	1	1	0	0	0
YMR001C	CDC5	1	1	1	1	0	0	0
YBR156C	SLI15	0
YDR108W	TRS85	1	1	1	1	0	0	0
YGR098C	ESP1	0
YPL242C	IQG1	1	1	1	1	0	1	0
YAL024C	LTE1	1	1	1	1	0	1	0
YLL003W	SFI1	1	1	1	1	1	0	0
YMR219W	ESC1	1	1	1	1	1	0	0
YJR109C	CPA2	1	1	1	1	1	0	0
YAR019C	CDC15	1	1	1	1	1	0	0
YGL093W	SPC105	1	1	1	1	0	1	1
